# Supplementary material
Source: PubMed Central journal article supplement (PMC7461684)
Supplement: ASN.2020010019SupplementaryData.pdf [file ASN.2020010019SupplementaryData.pdf]

**The impact of eplet mismatch load on de novo occurrence of donor-specific anti-HLA antibodies, rejection and graft failure after kidney transplantation: an observational cohort study**

---

Aleksandar Senev<sup>1,2,\*</sup>, Maarten Coemans<sup>1,3\*</sup>, Evelyne Lerut<sup>4</sup>, Vicky Van Sandt<sup>2</sup>, Johan Kerkhofs<sup>2</sup>, Liesbeth Daniëls<sup>2</sup>, Marleen Vanden Driessche<sup>2</sup>, Veerle Compernelle<sup>2</sup>, Ben Sprangers<sup>1,5</sup>, Elisabet Van Loon<sup>1,5</sup>, Jasper Callemeyn<sup>1,5</sup>, Frans Claas<sup>6</sup>, Anat R. Tambur<sup>7</sup>, Geert Verbeke<sup>3</sup>, Dirk Kuypers<sup>1,5</sup>, Marie-Paule Emonds<sup>1,2\*</sup> and Maarten Naesens<sup>1,5\*</sup>

<sup>1</sup> Department of Microbiology, Immunology and Transplantation, KU Leuven, University of Leuven, Belgium

<sup>2</sup> Histocompatibility and Immunogenetics Laboratory, Belgian Red Cross-Flanders, Mechelen, Belgium

<sup>3</sup> Leuven Biostatistics and Statistical Bioinformatics Centre (L-BioStat), Department of Public Health and Primary Care, KU Leuven—University of Leuven, Leuven, Belgium

<sup>4</sup> Department of Imaging & Pathology, University Hospitals Leuven, Leuven, Belgium

<sup>5</sup> Department of Nephrology and Renal Transplantation, University Hospitals Leuven, Leuven, Belgium

<sup>6</sup> Department of Immunohematology and Blood Transfusion, Leiden University Medical Centre, Leiden, the Netherlands

<sup>7</sup> Transplant Immunology Laboratory, Comprehensive Transplant Center, Feinberg School of Medicine, Northwestern University, Chicago, IL

**Contents**

*Figure S1: Flow chart inclusion criteria* ..... 1

*Figure S2: Violin plots of total eplet mismatch load per number of HLA antigen mismatches for (A) locus A, B, and DR (0–6) and for (B) locus A, B, DR, and DQ (0–8) (n=926)*..... 2

*Figure S3: Violin plots of total eplet mismatch load per number of HLA antigen mismatches for HLA-A, B, DR, and DQ (n=926)*..... 3

*Figure S4: Cumulative incidence of overall dnDSA occurrence (n=926)*..... 4

*Figure S5: Prevalence of ABMR, TCMR and mixed rejection in (A) protocol and (B) indication biopsies (n=3372)*..... 5

*Figure S6: Kaplan–Meier survival plots of rejection-free graft survival (n=883)*..... 6

*Figure S7: Low, intermediate and high eplet mismatch risk groups vs. dnDSA, rejection and graft failure.* ..... 6

*Figure S8: Kaplan–Meier survival plots of death-censored graft survival (n=926)*..... 8

*Table S1: Number of eplet mismatches in overall cohort, per class and per locus (n=926)*..... 9

*Table S2: HLA class- and molecule-specific dnDSA according to HLA antigen mismatches and eplet mismatch load (n=926)*..... 10

*Table S3: Eplet mismatch load calculated per HLA locus and single HLA molecule for DRB<sub>1345</sub>, DQA<sub>1B1</sub> and DPA<sub>1B1</sub> dnDSA (n=38)*..... 11

*Table S4: Univariable and multivariable HRs for dnDSA occurrence*..... 14

*Table S5: Univariable and multivariable HR for dnDSA class II occurrence*..... 15

*Table S6: The number of biopsies per patient and rejection subtypes (n=883)* ..... 16

*Table S7: Effects of number of HLA antigen and total eplet mismatches and antibody-verified eplet mismatches per locus on kidney allograft histology (n=926).* ..... 17

*Table S8: Univariable analysis of death-censored graft survival for the confounders included in the multivariable models (n=926)*..... 18

*Table S9: Harrell’s C-statistics of HLA mismatch calculations for death-censored graft survival (n=926).* ..... 19

*Table S10: Univariable and multivariable HRs for composite of graft survival and 50% eGFR decline from 3 months onwards according to HLA antigen mismatches and eplet mismatch load (n=886)*..... 20

*Table S11: STROBE Statement—Checklist of items included in this cohort study*..... 21

---

Both first and last authors contributed equally.

Correspondence to Maarten Naesens, [maarten.naesens@uzleuven.be](mailto:maarten.naesens@uzleuven.be).

**Figure S1: Flow chart inclusion criteria**

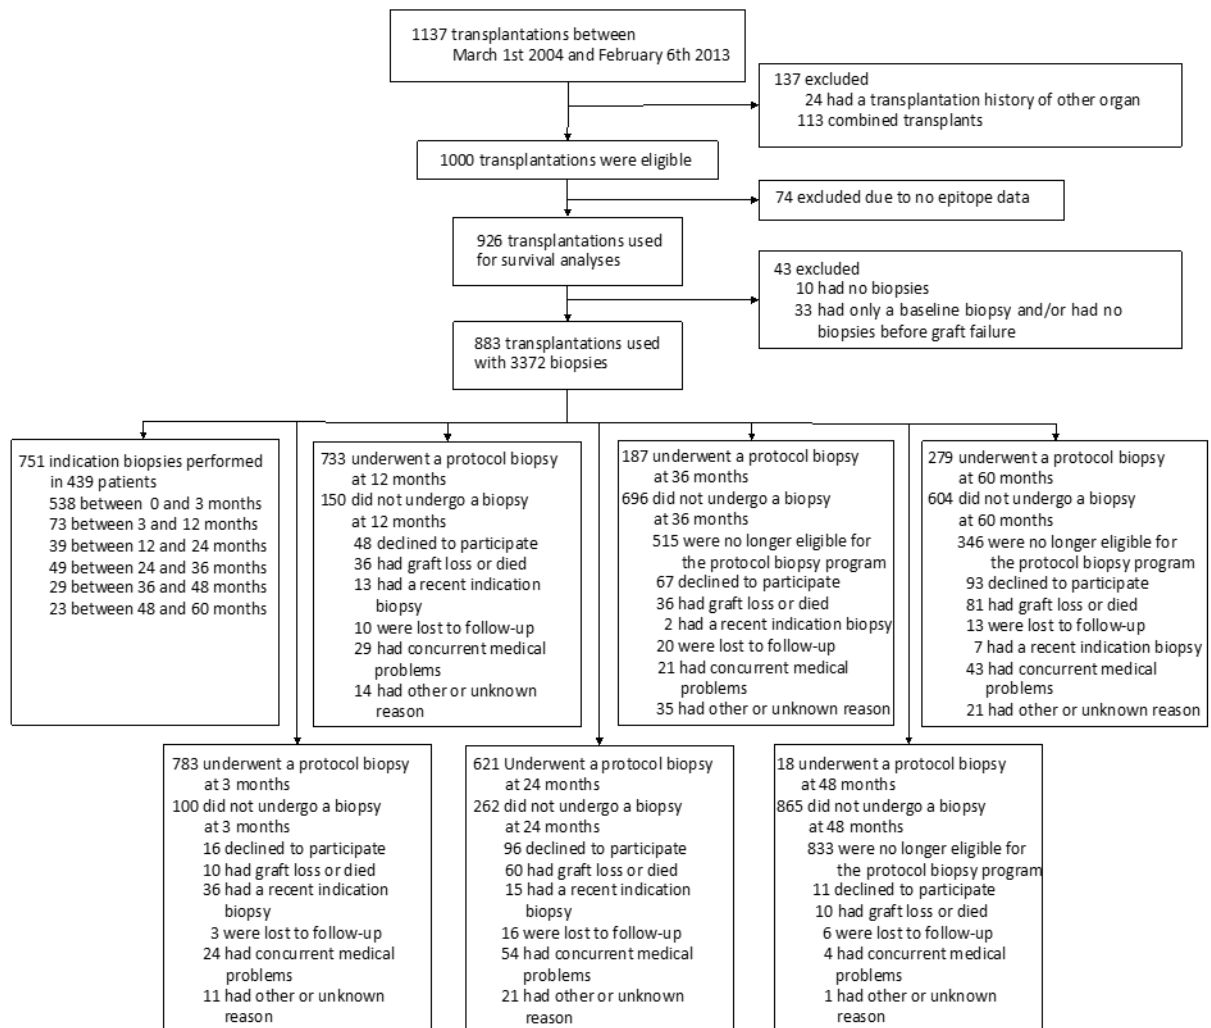

**Figure S2: Violin plots of total eplet mismatch load per number of HLA antigen mismatches for (A) locus A, B, and DR (0–6) and for (B) locus A, B, DR, and DQ (0–8) (n=926)**

Pearson correlations between the number of total eplet mismatches and the number of HLA-ABDR (0–6) and HLA-ABDRDQ (0–8) antigen mismatches amounted to 0.63 ( $p < 0.001$ ) and 0.72 ( $p < 0.001$ ), respectively. HLA=human leukocyte antigen.

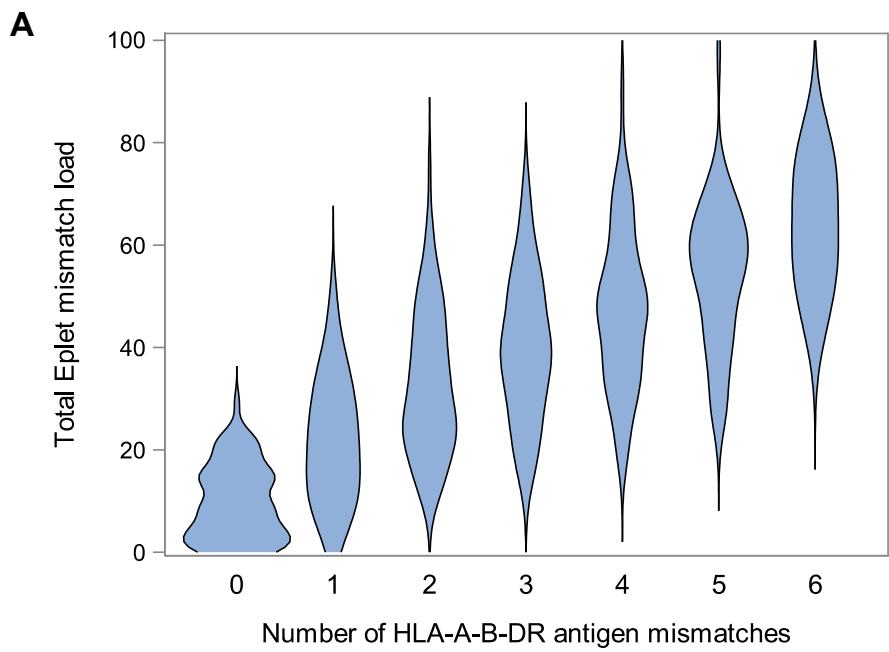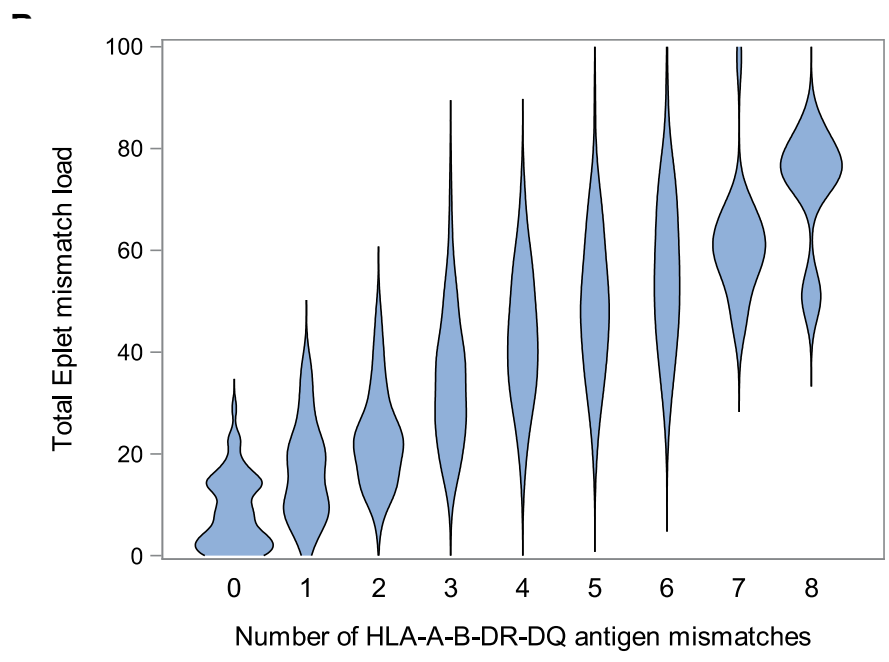

**Figure S3: Violin plots of total eplet mismatch load per number of HLA antigen mismatches for HLA-A, B, DR, and DQ (n=926)**

Spearman correlations between total eplet mismatches and HLA antigen mismatches were 0.81 ( $p < 0.001$ ) for HLA-A, 0.71 ( $p < 0.001$ ) for HLA-B, 0.79 ( $p < 0.001$ ) for HLA-DR, and 0.79 ( $p < 0.001$ ) for HLA-DQ. HLA=human leukocyte antigen

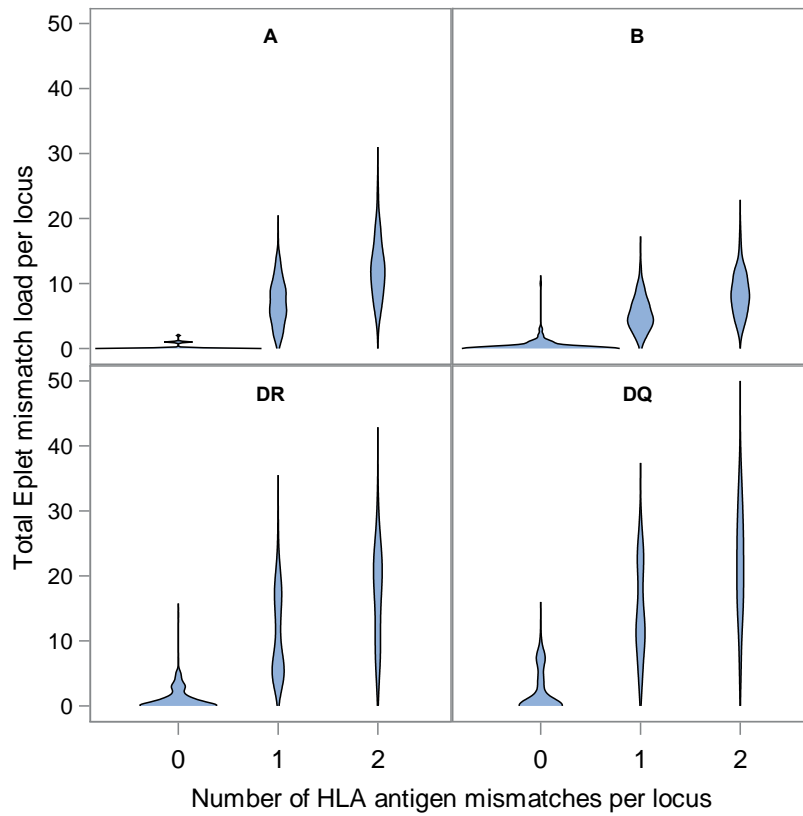

**Figure S4: Cumulative incidence of overall dnDSA occurrence (n=926)**

(A) Three categories of the number of HLA-ABDR antigen mismatches (0–2, 3–4, 5–6); (B) tertiles of the number of total eplet mismatches (0–27, 28–44, 45–98); (C) three categories of the number of HLA-ABDRDQ antigen mismatches (0–2, 3–4, 5–8); (D) tertiles of the number of antibody-verified eplet mismatches (0–11, 12–20, 21–45); (E) number of HLA-DR antigen mismatches (0, 1, 2); (F) tertiles of the number of DR antibody-verified eplet mismatches (0, 1–4, 5–15); (G) number of HLA-DQ antigen mismatches (0, 1, 2); and (H) tertiles of the number of DQ antibody-verified eplet mismatches (0–1, 2–6, 7–17). All other causes were censored. dnDSA=de novo donor-specific antibodies. HLA=human leukocyte antigen.

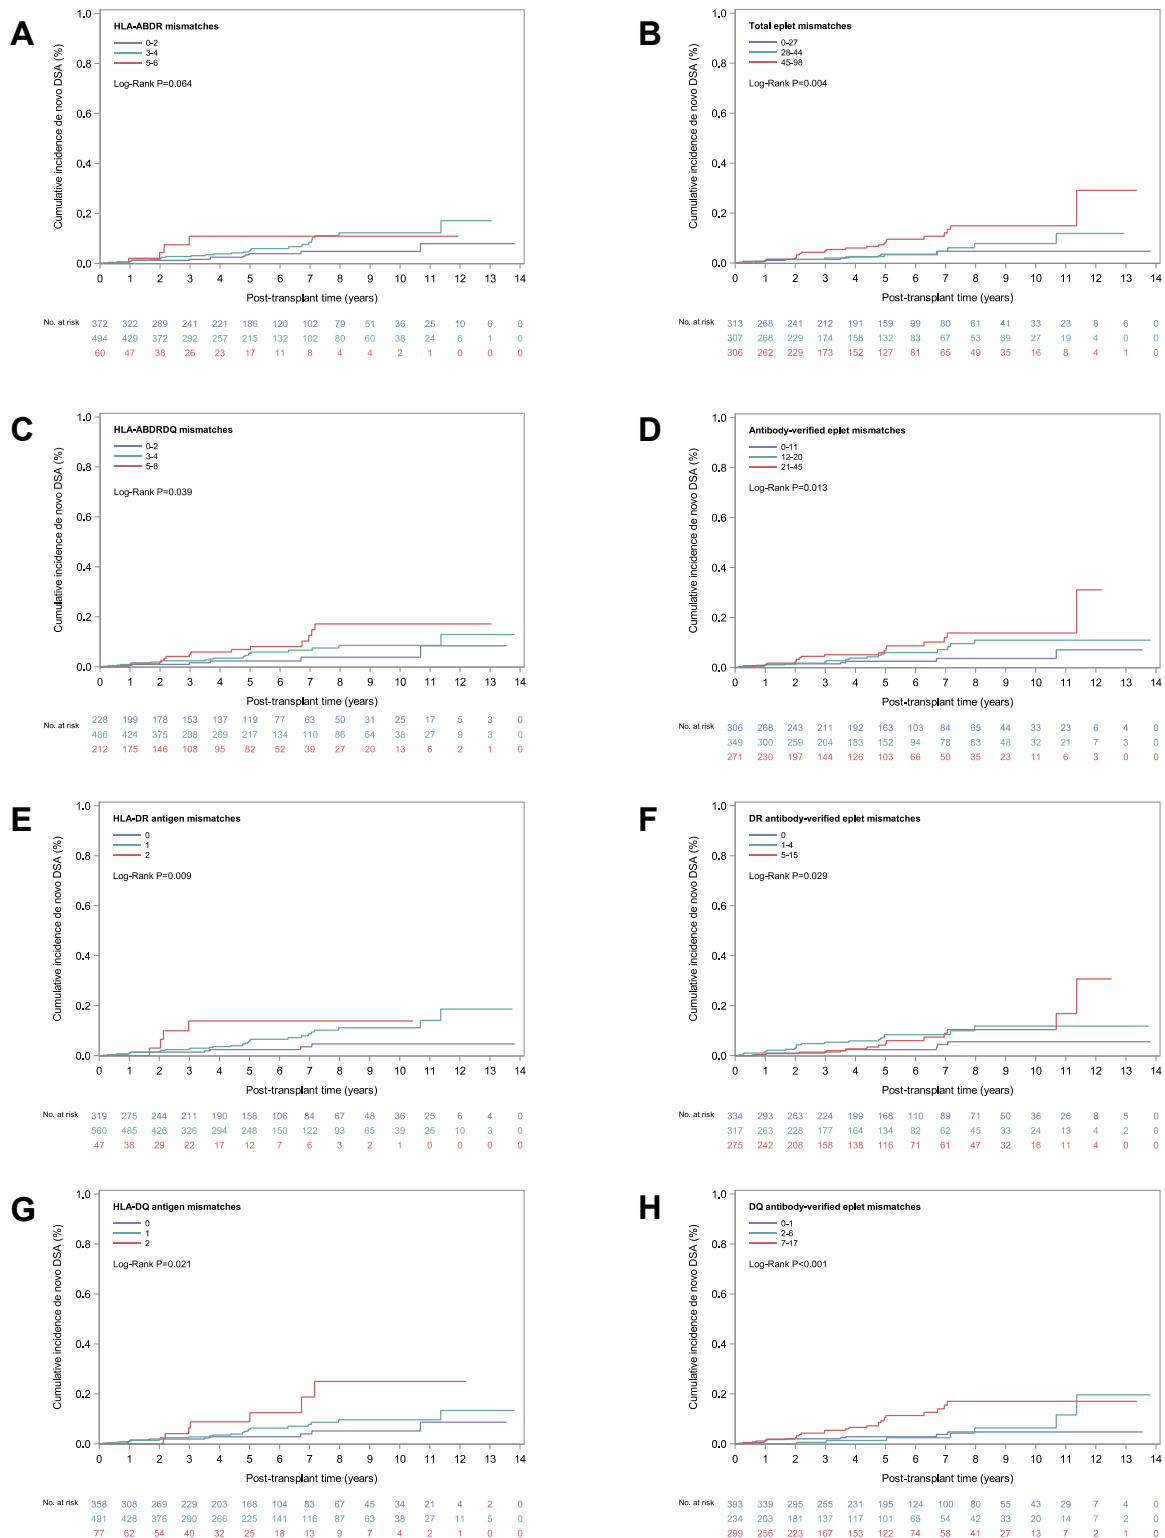

**Figure S5: Prevalence of ABMR, TCMR and mixed rejection in (A) protocol and (B) indication biopsies (n=3372)**

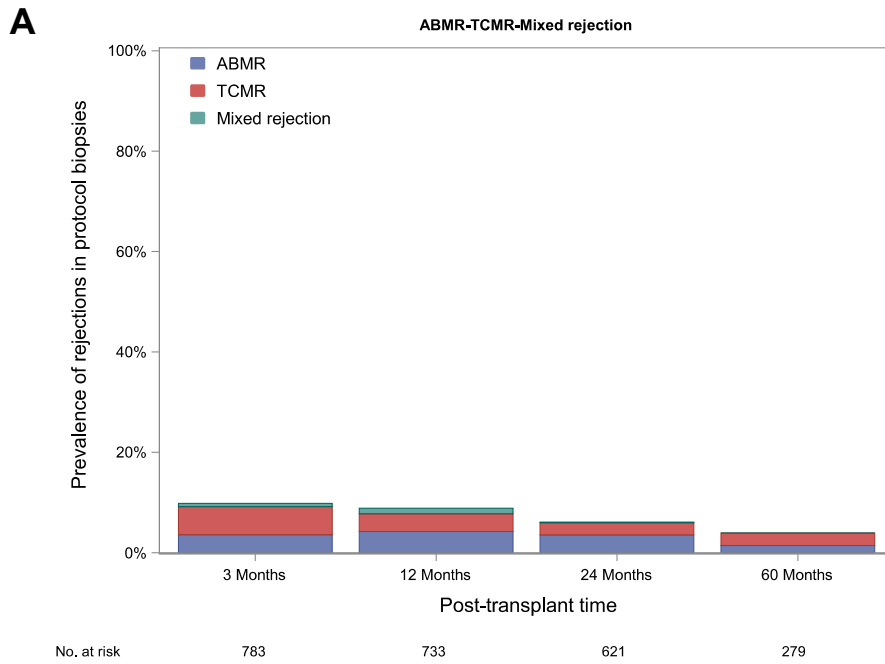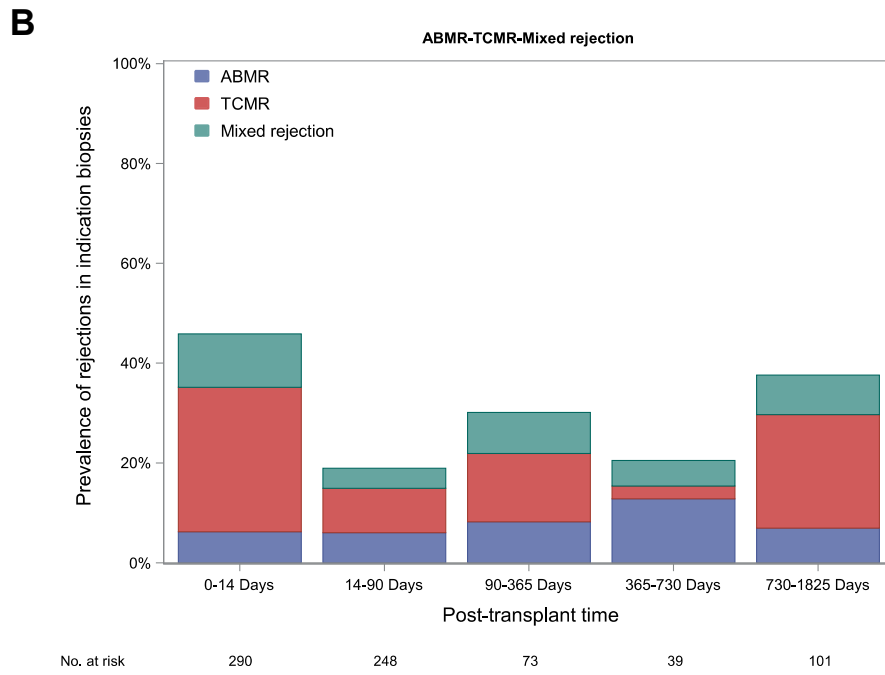

**Figure S6: Kaplan–Meier survival plots of rejection-free graft survival (n=883)**

(A) Three categories of the number of HLA-ABDR antigen mismatches (0–2, 3–4, 5–6); (B) tertiles of the number of total eplet mismatches (0–27, 28–44, 45–98); (C) three categories of the number of HLA-ABDRDQ antigen mismatches (0–2, 3–4, 5–8); (D) tertiles of the number of antibody-verified eplet mismatches (0–11, 12–20, 21–45); (E) number of HLA-DR antigen mismatches (0, 1, 2); (F) tertiles of the number of DR antibody-verified eplet mismatches (0, 1–4, 5–15); (G) number of HLA-DQ antigen mismatches (0, 1, 2); and (H) tertiles of the number of DQ antibody-verified eplet mismatches (0–1, 2–6, 7–17). HLA=human leukocyte antigen.

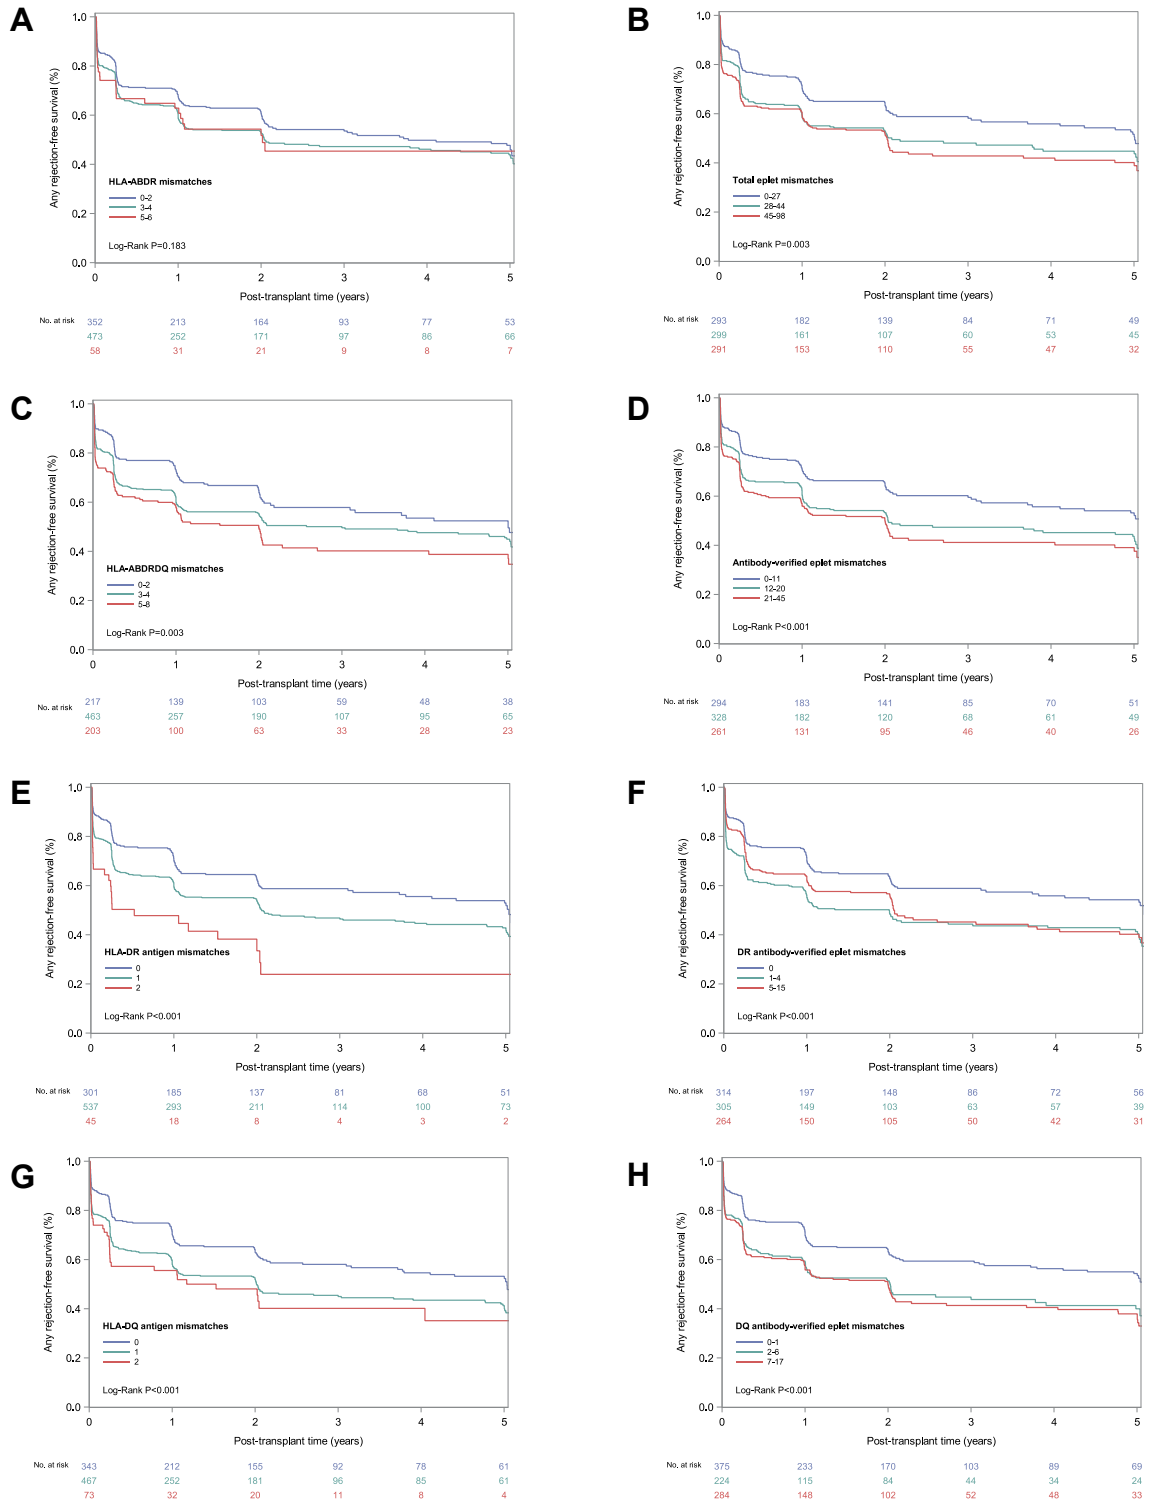

**Figure S7: Low, intermediate and high eplet mismatch risk groups vs. dnDSA, rejection and graft failure.**

(A) Cumulative incidence of de novo DSA occurrence against DR and/or DQ, (B) any-rejection free survival and (C) death-censored graft survival, according to the low, intermediate and high risk groups (as proposed by Wiebe et al. Am J Transplant 2019). (A) and (C) were based on the cohort of 926 transplantations, (B) was based on the biopsy cohort (n=883).

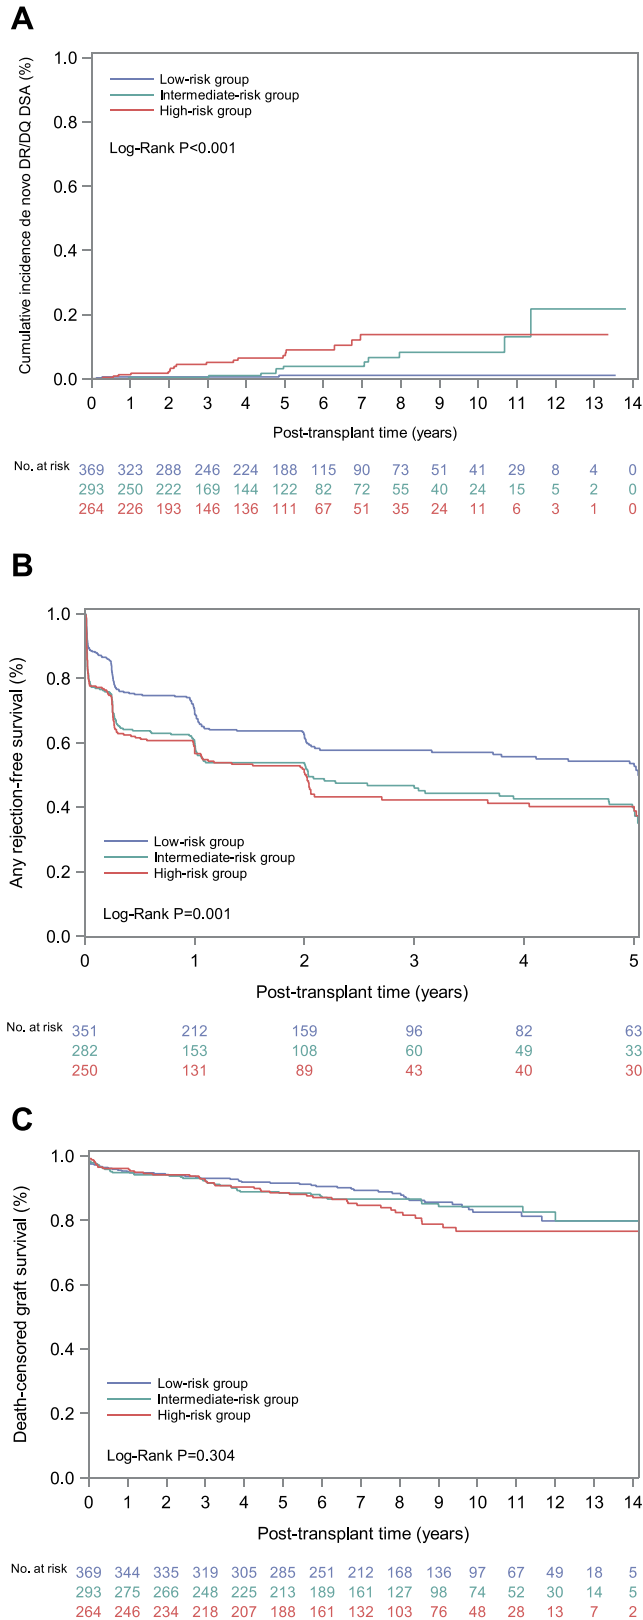



**Figure S8: Kaplan–Meier survival plots of death-censored graft survival (n=926).**

(A) Three categories of the number of HLA-ABDR antigen mismatches (0–2, 3–4, 5–6); (B) tertiles of the number of total eplet mismatches (0–27, 28–44, 45–98); (C) three categories of the number of HLA-ABDRDQ antigen mismatches (0–2, 3–4, 5–8); (D) tertiles of the number of antibody-verified eplet mismatches (0–11, 12–20, 21–45); (E) number of HLA-DR antigen mismatches (0, 1, 2); (F) tertiles of the number of DR antibody-verified eplet mismatches (0, 1–4, 5–15); (G) number of HLA-DQ antigen mismatches (0, 1, 2); and (H) tertiles of the number of DQ antibody-verified eplet mismatches (0–1, 2–6, 7–17). HLA=human leukocyte antigen.

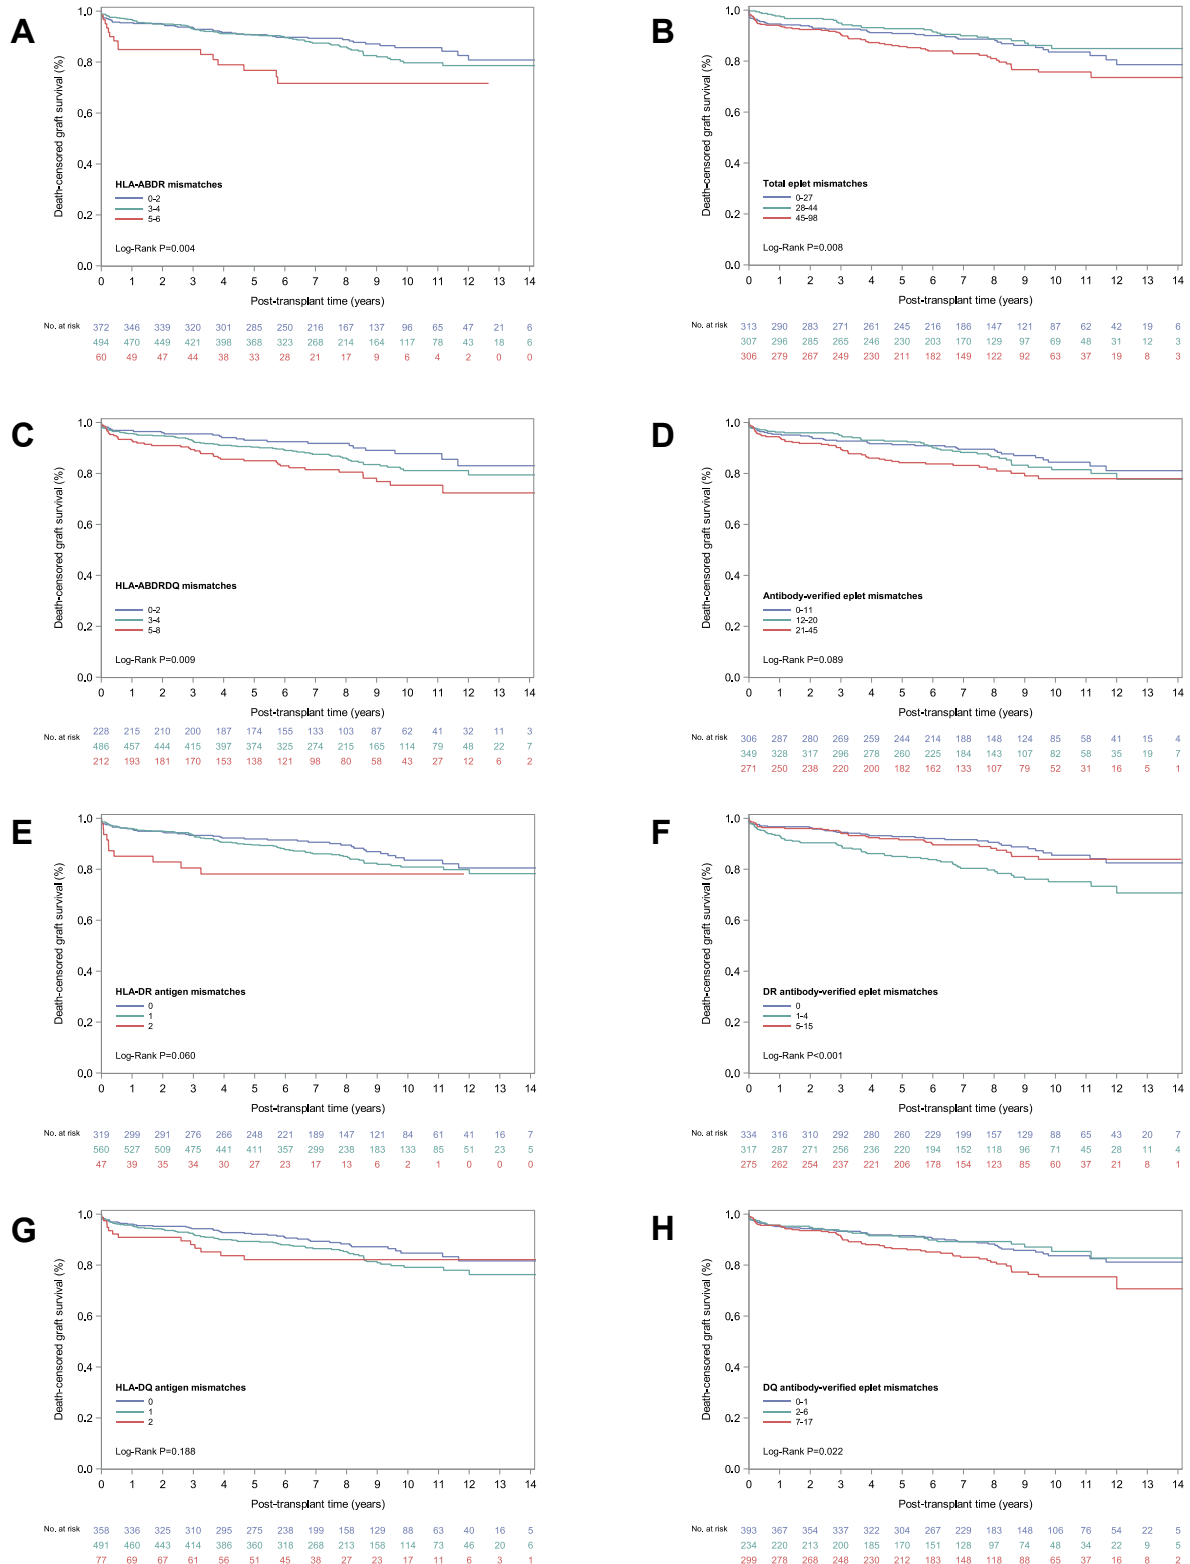

**Table S1: Number of eplet mismatches in overall cohort, per class and per locus (n=926)**

|                                             | Eplet mismatches, n |                         |
|---------------------------------------------|---------------------|-------------------------|
|                                             | Total eplet         | Antibody-verified eplet |
| Total eplet mismatch load, mean $\pm$ SD    | 36.7 $\pm$ 18.0     | 16.0 $\pm$ 8.7          |
| Class I eplet mismatch load, mean $\pm$ SD  | 12.3 $\pm$ 7.0      | 6.8 $\pm$ 4.2           |
| Class II eplet mismatch load, mean $\pm$ SD | 24.4 $\pm$ 15.5     | 9.1 $\pm$ 7.1           |
| A eplet mismatch load, mean $\pm$ SD        | 6.4 $\pm$ 5.5       | 3.5 $\pm$ 3.2           |
| B eplet mismatch load, mean $\pm$ SD        | 5.1 $\pm$ 3.7       | 2.3 $\pm$ 2.0           |
| C eplet mismatch load, mean $\pm$ SD        | 5.0 $\pm$ 4.0       | 2.1 $\pm$ 2.0           |
| DR eplet mismatch load, mean $\pm$ SD       | 7.9 $\pm$ 7.5       | 3.0 $\pm$ 3.5           |
| DQ eplet mismatch load, mean $\pm$ SD       | 10.5 $\pm$ 9.3      | 4.5 $\pm$ 4.6           |
| DP eplet mismatch load, mean $\pm$ SD       | 6.0 $\pm$ 5.3       | 1.6 $\pm$ 1.6           |

**Table S2: HLA class- and molecule-specific dnDSA according to HLA antigen mismatches and eplet mismatch load (n=926)**

| HLA mismatches                             | Patients at risk | Events | Univariable HR (95% CI) | p value | Multivariable† HR (95% CI) | p value |
|--------------------------------------------|------------------|--------|-------------------------|---------|----------------------------|---------|
| Antigen (split level)                      |                  |        |                         |         |                            |         |
| Class I HLA antigen mismatches (A+B+C)     | 926              | 11     | 1.60 (1.03–2.47)        | 0.036   | 1.57 (1.00–2.47)           | 0.052   |
| A+B antigen mismatches                     | 926              | 8      | 1.66 (0.83–3.33)        | 0.152   | -                          | ..      |
| Class II HLA antigen mismatches (DR+DQ+DP) | 926              | 34     | 1.60 (1.21–2.10)        | <0.001  | 1.67 (1.23–2.26)           | 0.001   |
| DR+DQ antigen mismatches                   | 926              | 32     | 2.02 (1.44–2.83)        | <0.001  | 2.80 (1.80–4.35)           | <0.001  |
| A antigen                                  |                  |        |                         |         |                            |         |
| 0 mismatch                                 | 243              | 0      | 1                       | ..      | 1                          | ..      |
| 1 mismatch                                 | 468              | 2      | -                       | -       | -                          | -       |
| 2 mismatches                               | 215              | 3      | -                       | -       | -                          | -       |
| B antigen                                  |                  |        |                         |         |                            |         |
| 0 mismatch                                 | 180              | 0      | 1                       | ..      | 1                          | ..      |
| 1 mismatch                                 | 545              | 2      | -                       | -       | -                          | -       |
| 2 mismatches                               | 201              | 2      | -                       | -       | -                          | -       |
| DR antigen                                 |                  |        |                         |         |                            |         |
| 0 mismatch                                 | 319              | 1      | 1                       | ..      | 1                          | ..      |
| 1 mismatch                                 | 560              | 9      | -                       | -       | -                          | -       |
| 2 mismatches                               | 47               | 0      | -                       | -       | -                          | -       |
| DQ antigen                                 |                  |        |                         |         |                            |         |
| 0 mismatch                                 | 358              | 1      | 1                       | ..      | 1                          | ..      |
| 1 mismatch                                 | 491              | 19     | -                       | -       | -                          | -       |
| 2 mismatches                               | 77               | 5      | -                       | -       | -                          | -       |
| Antibody-verified eplets                   |                  |        |                         |         |                            |         |
| A molecule                                 | 926              | 5      | 1.33 (1.04–1.71)        | 0.03    | -                          | -       |
| B molecule                                 | 926              | 4      | 1.12 (0.71–1.76)        | 0.62    | -                          | -       |
| C molecule                                 | 926              | 5      | 1.26 (0.83–1.90)        | 0.28    | -                          | -       |
| DR molecule                                | 926              | 10     | 1.20 (1.04–1.39)        | 0.02    | -                          | -       |
| DQ molecule                                | 926              | 25     | 1.25 (1.15–1.37)        | <0.001  | 1.30 (1.18–1.44)           | <0.001  |
| DP molecule                                | 926              | 3      | 1.31 (0.70–2.45)        | 0.40    | -                          | -       |

†Multivariable models were corrected for donor and recipient sex, donor and recipient age, recipient race, recipient body mass index, donor type, cold ischaemia time, repeat transplantation, and pretransplant HLA antibodies (absence; non-DSA HLA antibodies; DSA).

**Table S3: Eplet mismatch load calculated per HLA locus and single HLA molecule for DRB<sub>1345</sub>, DQA<sub>1B1</sub> and DPA<sub>1B1</sub> dnDSA (n=38)**

Thresholds for de novo DSA development are: per HLA locus, DRB<sub>1345</sub><10 and DQA<sub>1B1</sub><17 and per single HLA molecule: DRB<sub>1345</sub><7 or DQA<sub>1B1</sub><9. The DSA that were developed below the suggested threshold for the given HLA locus or HLA molecule are highlighted in yellow.

| Patient ID | HLA locus                   |                                             |                                                         | Single HLA molecule       |                                |                                                   |                                                               |
|------------|-----------------------------|---------------------------------------------|---------------------------------------------------------|---------------------------|--------------------------------|---------------------------------------------------|---------------------------------------------------------------|
|            | HLA locus targeted by dnDSA | Total eplet mismatch load in targeted locus | Antibody-verified eplet mismatch load in targeted locus | Mismatch at antigen level | HLA molecule targeted by dnDSA | Total eplet mismatch load per single HLA molecule | Antibody-verified eplet mismatch load per single HLA molecule |
| #1         | DRB <sub>1345</sub>         | 18                                          | 8                                                       | Yes                       | Yes                            | 18                                                | 8                                                             |
|            |                             |                                             |                                                         | No                        | No                             | 0                                                 | 0                                                             |
| #2         | DRB <sub>1345</sub>         | 15                                          | 5                                                       | Yes                       | Yes                            | 15                                                | 5                                                             |
|            |                             |                                             |                                                         | No                        | No                             | 0                                                 | 0                                                             |
| #3         | DRB <sub>1345</sub>         | 10                                          | 5                                                       | Yes                       | Yes                            | 9                                                 | 5                                                             |
|            |                             |                                             |                                                         | Yes                       | No                             | 1                                                 | 0                                                             |
| #4         | DRB <sub>1345</sub>         | 1                                           | 1                                                       | No                        | Yes                            | 1                                                 | 1                                                             |
|            |                             |                                             |                                                         | No                        | No                             | 0                                                 | 0                                                             |
| #5         | DRB <sub>1345</sub>         | 16                                          | 11                                                      | Yes                       | Yes                            | 16                                                | 11                                                            |
|            |                             |                                             |                                                         | No                        | No                             | 0                                                 | 0                                                             |
| #6         | DRB <sub>1345</sub>         | 5                                           | 4                                                       | Yes                       | Yes                            | 5                                                 | 4                                                             |
|            |                             |                                             |                                                         | No                        | No                             | 0                                                 | 0                                                             |
| #7         | DRB <sub>1345</sub>         | 6                                           | 2                                                       | Yes                       | Yes                            | 4                                                 | 2                                                             |
|            |                             |                                             |                                                         | No                        | No                             | 2                                                 | 0                                                             |
| #8         | DRB <sub>1345</sub>         | 19                                          | 11                                                      | Yes                       | Yes                            | 15                                                | 11                                                            |
|            |                             |                                             |                                                         | No                        | No                             | 4                                                 | 0                                                             |
|            | DQA <sub>1B1</sub>          | 12                                          | 8                                                       | Yes                       | Yes                            | 12                                                | 8                                                             |
|            |                             |                                             |                                                         | No                        | No                             | 0                                                 | 0                                                             |
| #9         | DRB <sub>1345</sub>         | 18                                          | 7                                                       | Yes                       | Yes                            | 18                                                | 7                                                             |
|            |                             |                                             |                                                         | No                        | No                             | 0                                                 | 0                                                             |
|            | DQA <sub>1B1</sub>          | 20                                          | 10                                                      | Yes                       | Yes                            | 20                                                | 10                                                            |
|            |                             |                                             |                                                         | No                        | No                             | 0                                                 | 0                                                             |
| #10        | DRB <sub>1345</sub>         | 8                                           | 1                                                       | Yes                       | Yes                            | 7                                                 | 1                                                             |
|            |                             |                                             |                                                         | No                        | No                             | 2                                                 | 0                                                             |

| Patient ID | HLA locus targeted by dnDSA     | HLA locus                                   |                                                         | Mismatch at antigen level | Single HLA molecule            |                                                   |                                                               |
|------------|---------------------------------|---------------------------------------------|---------------------------------------------------------|---------------------------|--------------------------------|---------------------------------------------------|---------------------------------------------------------------|
|            |                                 | Total eplet mismatch load in targeted locus | Antibody-verified eplet mismatch load in targeted locus |                           | HLA molecule targeted by dnDSA | Total eplet mismatch load per single HLA molecule | Antibody-verified eplet mismatch load per single HLA molecule |
|            | DQA <sub>1</sub> B <sub>1</sub> | 7                                           | 1                                                       | No                        | Yes                            | 7                                                 | 1                                                             |
|            |                                 |                                             |                                                         | No                        | No                             | 0                                                 | 0                                                             |
| #11        | DQA <sub>1</sub> B <sub>1</sub> | 11                                          | 5                                                       | Yes                       | Yes                            | 11                                                | 5                                                             |
|            |                                 |                                             |                                                         | Yes                       | Yes                            | 1                                                 | 0                                                             |
| #12        | DQA <sub>1</sub> B <sub>1</sub> | 26                                          | 10                                                      | No                        | No                             | 0                                                 | 0                                                             |
|            |                                 |                                             |                                                         | Yes                       | Yes                            | 26                                                | 10                                                            |
| #13        | DQA <sub>1</sub> B <sub>1</sub> | 12                                          | 5                                                       | No                        | No                             | 0                                                 | 0                                                             |
|            |                                 |                                             |                                                         | Yes                       | Yes                            | 12                                                | 5                                                             |
| #14        | DQA <sub>1</sub> B <sub>1</sub> | 20                                          | 7                                                       | No                        | No                             | 0                                                 | 0                                                             |
|            |                                 |                                             |                                                         | Yes                       | Yes                            | 20                                                | 7                                                             |
| #15        | DQA <sub>1</sub> B <sub>1</sub> | 22                                          | 11                                                      | No                        | No                             | 0                                                 | 0                                                             |
|            |                                 |                                             |                                                         | Yes                       | Yes                            | 22                                                | 11                                                            |
| #16        | DQA <sub>1</sub> B <sub>1</sub> | 29                                          | 14                                                      | Yes                       | No                             | 21                                                | 9                                                             |
|            |                                 |                                             |                                                         | Yes                       | Yes                            | 23                                                | 10                                                            |
| #17        | DQA <sub>1</sub> B <sub>1</sub> | 16                                          | 3                                                       | Yes                       | No                             | 14                                                | 1                                                             |
|            |                                 |                                             |                                                         | Yes                       | Yes                            | 8                                                 | 2                                                             |
| #18        | DQA <sub>1</sub> B <sub>1</sub> | 14                                          | 9                                                       | No                        | No                             | 0                                                 | 0                                                             |
|            |                                 |                                             |                                                         | Yes                       | Yes                            | 14                                                | 9                                                             |
| #19        | DQA <sub>1</sub> B <sub>1</sub> | 20                                          | 6                                                       | No                        | No                             | 0                                                 | 0                                                             |
|            |                                 |                                             |                                                         | Yes                       | Yes                            | 20                                                | 6                                                             |
| #20        | DQA <sub>1</sub> B <sub>1</sub> | 12                                          | 7                                                       | No                        | No                             | 0                                                 | 0                                                             |
|            |                                 |                                             |                                                         | Yes                       | Yes                            | 12                                                | 7                                                             |
| #21        | DQA <sub>1</sub> B <sub>1</sub> | 10                                          | 5                                                       | No                        | No                             | 0                                                 | 0                                                             |
|            |                                 |                                             |                                                         | Yes                       | Yes                            | 10                                                | 5                                                             |
| #22        | DQA <sub>1</sub> B <sub>1</sub> | 18                                          | 12                                                      | No                        | No                             | 2                                                 | 0                                                             |
|            |                                 |                                             |                                                         | Yes                       | Yes                            | 18                                                | 12                                                            |
| #23        | DQA <sub>1</sub> B <sub>1</sub> | 22                                          | 11                                                      | No                        | No                             | 0                                                 | 0                                                             |
|            |                                 |                                             |                                                         | Yes                       | Yes                            | 22                                                | 11                                                            |
| #24        | DQA <sub>1</sub> B <sub>1</sub> | 13                                          | 9                                                       | No                        | No                             | 0                                                 | 0                                                             |

| Patient ID | HLA locus targeted by dnDSA     | HLA locus                                   |                                                         | Single HLA molecule       |                                |                                                   |                                                               |
|------------|---------------------------------|---------------------------------------------|---------------------------------------------------------|---------------------------|--------------------------------|---------------------------------------------------|---------------------------------------------------------------|
|            |                                 | Total eplet mismatch load in targeted locus | Antibody-verified eplet mismatch load in targeted locus | Mismatch at antigen level | HLA molecule targeted by dnDSA | Total eplet mismatch load per single HLA molecule | Antibody-verified eplet mismatch load per single HLA molecule |
| #25        | DQA <sub>1</sub> B <sub>1</sub> | 24                                          | 13                                                      | Yes                       | Yes                            | 13                                                | 9                                                             |
|            |                                 |                                             |                                                         | No                        | No                             | 0                                                 | 0                                                             |
| #26        | DQA <sub>1</sub> B <sub>1</sub> | 24                                          | 13                                                      | Yes                       | Yes                            | 24                                                | 13                                                            |
|            |                                 |                                             |                                                         | No                        | No                             | 0                                                 | 0                                                             |
| #27        | DQA <sub>1</sub> B <sub>1</sub> | 22                                          | 11                                                      | Yes                       | Yes                            | 22                                                | 11                                                            |
|            |                                 |                                             |                                                         | No                        | No                             | 0                                                 | 0                                                             |
| #28        | DQA <sub>1</sub> B <sub>1</sub> | 23                                          | 13                                                      | Yes                       | Yes                            | 23                                                | 13                                                            |
|            |                                 |                                             |                                                         | No                        | No                             | 0                                                 | 0                                                             |
| #29        | DQA <sub>1</sub> B <sub>1</sub> | 25                                          | 11                                                      | Yes                       | Yes                            | 25                                                | 11                                                            |
|            |                                 |                                             |                                                         | No                        | No                             | 0                                                 | 0                                                             |
| #30        | DQA <sub>1</sub> B <sub>1</sub> | 35                                          | 15                                                      | Yes                       | Yes                            | 19                                                | 9                                                             |
|            |                                 |                                             |                                                         | Yes                       | Yes                            | 20                                                | 7                                                             |
| #31        | DQA <sub>1</sub> B <sub>1</sub> | 12                                          | 7                                                       | No                        | No                             | 1                                                 | 0                                                             |
|            |                                 |                                             |                                                         | Yes                       | Yes                            | 13                                                | 7                                                             |
| #32        | DQA <sub>1</sub> B <sub>1</sub> | 25                                          | 15                                                      | Yes                       | Yes                            | 20                                                | 14                                                            |
|            |                                 |                                             |                                                         | Yes                       | No                             | 15                                                | 9                                                             |
|            | DPA <sub>1</sub> B <sub>1</sub> | 9                                           | 3                                                       | /                         | Yes                            | 9                                                 | 3                                                             |
|            |                                 |                                             |                                                         | /                         | No                             | 0                                                 | 0                                                             |
| #33        | DPA <sub>1</sub> B <sub>1</sub> | 13                                          | 2                                                       | /                         | Yes                            | 13                                                | 2                                                             |
|            |                                 |                                             |                                                         | /                         | No                             | 0                                                 | 0                                                             |
| #34        | DPA <sub>1</sub> B <sub>1</sub> | 5                                           | 2                                                       | /                         | Yes                            | 5                                                 | 2                                                             |
|            |                                 |                                             |                                                         | /                         | No                             | 0                                                 | 0                                                             |

dnDSA=de novo donor-specific antibodies. HLA=human leukocyte antigen.

**Table S4: Univariable and multivariable HRs for dnDSA occurrence**

Patients grouped according to different level of molecular mismatches in HLA DQB<sub>1</sub> and DQA<sub>1</sub> loci (n=926). Statistically significant associations were highlighted in yellow.

| DQB <sub>1</sub> MM (4-digit) | DQA <sub>1</sub> MM (2-digit) | Patients at risk | Event | Univariable HR<br>(95% CI) | p value | Multivariable* HR<br>(95% CI) | p value |
|-------------------------------|-------------------------------|------------------|-------|----------------------------|---------|-------------------------------|---------|
| dnDSA                         |                               |                  |       |                            |         |                               |         |
| 0                             | 0                             | 224              | 7     | 1                          | ..      | 1                             | ..      |
| 0                             | 1                             | 11               | 0     | ..                         | ..      | ..                            | ..      |
| 1                             | 0                             | 252              | 6     | 0.72 (0.24–2.13)           | 0.55    | 0.63 (0.21–1.90)              | 0.41    |
| 1                             | 1                             | 307              | 21    | 2.46 (1.05–5.80)           | 0.04    | 2.41 (1.01–5.76)              | 0.05    |
| 2                             | 0                             | 43               | 3     | 2.44 (0.63–9.45)           | 0.20    | 2.30 (0.57–9.20)              | 0.24    |
| 2                             | 1                             | 77               | 4     | 2.21 (0.65–7.58)           | 0.21    | 2.39 (0.69–8.36)              | 0.17    |
| 2                             | 2                             | 12               | 2     | 6.53 (1.35–31.51)          | 0.02    | 9.01 (1.73–46.99)             | 0.01    |
| Class II dnDSA                |                               |                  |       |                            |         |                               |         |
| 0                             | 0                             | 224              | 2     | 1                          | ..      | 1                             | ..      |
| 0                             | 1                             | 11               | 0     | ..                         | ..      | ..                            | ..      |
| 1                             | 0                             | 252              | 5     | 2.08 (0.40–10.75)          | 0.38    | 1.72 (0.33–9.01)              | 0.52    |
| 1                             | 1                             | 307              | 20    | 8.41 (1.96–36.00)          | 0.004   | 8.22 (1.89–35.71)             | 0.005   |
| 2                             | 0                             | 43               | 2     | 5.42 (0.76–38.55)          | 0.09    | 5.15 (0.70–38.13)             | 0.11    |
| 2                             | 1                             | 77               | 4     | 8.12 (1.48–44.48)          | 0.02    | 9.11 (1.62–51.16)             | 0.01    |
| 2                             | 2                             | 12               | 1     | 10.95 (0.99–121.21)        | 0.05    | 16.88 (1.42–201.12)           | 0.03    |

dnDSA=de novo donor-specific antibodies. HLA=human leukocyte antigen. HR=hazard ratio. MM=mismatch.

\*Multivariable models were corrected for donor and recipient sex, donor and recipient age, recipient race, recipient body mass index, donor type, cold ischaemia time, repeat transplantation, and pretransplant HLA antibodies (absence; non-DSA HLA antibodies; DSA).

**Table S5: Univariable and multivariable HR for dnDSA class II occurrence**

Patients grouped according to different HLA levels (2-digit and 4-digit) of molecular mismatches in HLA DQB<sub>1</sub> and DQA<sub>1</sub> loci (n=926).

| HLA mismatches             | Patients at risk | Events | Univariable HR (95% CI) | p value | Multivariable† HR (95% CI) | p value |
|----------------------------|------------------|--------|-------------------------|---------|----------------------------|---------|
| DQA <sub>1</sub> (2-digit) |                  |        |                         |         |                            |         |
| 0 mismatch                 | 519              | 9      | 1                       | ..      | 1                          | ..      |
| 1 mismatch                 | 395              | 24     | 4.30 (1.99–9.28)        | <0.001  | 4.62 (2.09–10.20)          | <0.001  |
| 2 mismatches               | 12               | 1      | 5.84 (0.74–46.30)       | 0.09    | 9.73 (1.12–84.65)          | 0.04    |
| DQA <sub>1</sub> (4-digit) |                  |        |                         |         |                            |         |
| 0 mismatch                 | 260              | 4      | 1                       | ..      | 1                          | ..      |
| 1 mismatch                 | 562              | 26     | 3.12 (1.09–8.94)        | 0.03    | 2.79 (0.96–8.14)           | 0.06    |
| 2 mismatches               | 104              | 4      | 3.11 (0.78–12.45)       | 0.11    | 3.27 (0.79–13.50)          | 0.10    |
| DQB <sub>1</sub> (4-digit) |                  |        |                         |         |                            |         |
| 0 mismatch                 | 235              | 2      | 1                       | ..      | 1                          | ..      |
| 1 mismatch                 | 559              | 25     | 5.47 (1.30–23.09)       | 0.02    | 5.07 (1.19–21.63)          | 0.03    |
| 2 mismatches               | 132              | 7      | 7.64 (1.59–36.82)       | 0.01    | 8.27 (1.69–40.46)          | 0.01    |

†Multivariable models were corrected for donor and recipient sex, donor and recipient age, recipient race, recipient body mass index, donor type, cold ischaemia time, repeat transplantation, and pretransplant HLA antibodies (absence; non-DSA HLA antibodies; DSA).



**Table S6: The number of biopsies per patient and rejection subtypes (n=883)**

|                                     |                   | <b># ABMR</b> | <b># TCMR</b> | <b># TCMR including borderline changes</b> | <b># Any rejection</b> |
|-------------------------------------|-------------------|---------------|---------------|--------------------------------------------|------------------------|
|                                     |                   | <b>n (%)</b>  | <b>n (%)</b>  | <b>n (%)</b>                               | <b>n (%)</b>           |
| One biopsy per patient (62)         | First biopsy      | 6 (9.7)       | 8 (12.9)      | 15 (24.2)                                  | 16 (25.8)              |
| Multiple biopsies per patient (821) | First biopsy      | 61 (7.4)      | 144 (17.5)    | 216 (26.3)                                 | 239 (29.1)             |
|                                     | Repeated biopsies | 147 (5.9)     | 161 (6.5)     | 391 (15.7)                                 | 486 (19.5)             |

ABMR=antibody-mediated rejection. TCMR=T cell-mediated rejection. Any rejection = ABMR and/or TCMR.

**Table S7: Effects of number of HLA antigen and total eplet mismatches and antibody-verified eplet mismatches per locus on kidney allograft histology (n=926).**

(Any rejection; ABMR; TCMR grade I–III; TCMR including borderline changes.) The estimates and confidence bounds were based on separate logistic mixed models with random intercepts, a linear fixed and random effect of time, corrected for donor/recipient sex, donor/recipient age, recipient race, recipient body mass index, donor type, cold ischaemia time, repeat transplantation, and pretransplant HLA antibodies/DSA. All post-transplant biopsies (n=3372) were used for these analyses.

| HLA mismatches               | Any rejection       |         | ABMR                |         | TCMR I–III          |         | TCMR including borderline changes |         |
|------------------------------|---------------------|---------|---------------------|---------|---------------------|---------|-----------------------------------|---------|
|                              | Odds ratio (95% CI) | p value | Odds ratio (95% CI) | p value | Odds ratio (95% CI) | p value | Odds ratio (95% CI)               | p value |
| <b>Antigen (split level)</b> |                     |         |                     |         |                     |         |                                   |         |
| HLA-ABDR (0–6)               | 1.15 (1.03–1.27)    | 0.01    | 1.18 (0.90–1.55)    | 0.24    | 1.11 (0.98–1.27)    | 0.10    | 1.15 (1.04–1.27)                  | 0.01    |
| HLA-ABDRDQ (0–8)             | 1.16 (1.07–1.26)    | <0.001  | 1.25 (1.00–1.57)    | 0.05    | 1.15 (1.04–1.28)    | 0.01    | 1.16 (1.07–1.26)                  | <0.001  |
| A locus                      |                     |         |                     |         |                     |         |                                   |         |
| 0                            | 1                   | ..      | 1                   | ..      | 1                   | ..      | 1                                 | ..      |
| 1                            | 0.80 (0.59–1.09)    | 0.16    | 1.51 (0.70–3.26)    | 0.30    | 1.34 (0.91–1.96)    | 0.14    | 0.80 (0.60–1.09)                  | 0.16    |
| 2                            | 1.00 (0.70–1.43)    | 0.99    | 1.21 (0.48–3.06)    | 0.68    | 1.00 (0.64–1.58)    | 1.00    | 1.02 (0.72–1.44)                  | 0.91    |
| B locus                      |                     |         |                     |         |                     |         |                                   |         |
| 0                            | 1                   | ..      | 1                   | ..      | 1                   | ..      | 1                                 | ..      |
| 1                            | 1.32 (0.94–1.86)    | 0.11    | 1.66 (0.68–4.03)    | 0.26    | 1.57 (1.01–2.44)    | 0.04    | 1.32 (0.94–1.84)                  | 0.11    |
| 2                            | 1.41 (0.93–2.14)    | 0.11    | 1.03 (0.34–3.16)    | 0.95    | 1.19 (0.69–2.04)    | 0.53    | 1.45 (0.96–2.19)                  | 0.08    |
| DR locus                     |                     |         |                     |         |                     |         |                                   |         |
| 0                            | 1                   | ..      | 1                   | ..      | 1                   | ..      | 1                                 | ..      |
| 1                            | 1.57 (1.19–2.07)    | 0.002   | 2.18 (1.03–4.60)    | 0.04    | 1.35 (0.95–1.93)    | 0.09    | 1.56 (1.18–2.05)                  | 0.002   |
| 2                            | 2.60 (1.46–4.66)    | 0.001   | 3.38 (0.78–14.59)   | 0.10    | 3.16 (1.62–6.17)    | <0.001  | 3.37 (1.91–5.92)                  | <0.001  |
| DQ locus                     |                     |         |                     |         |                     |         |                                   |         |
| 0                            | 1                   | ..      | 1                   | ..      | 1                   | ..      | 1                                 | ..      |
| 1                            | 1.55 (1.19–2.03)    | 0.001   | 2.05 (1.02–4.14)    | 0.05    | 1.57 (1.11–2.21)    | 0.01    | 1.47 (1.13–1.92)                  | 0.005   |
| 2                            | 2.02 (1.26–3.25)    | 0.004   | 4.07 (1.28–12.97)   | 0.02    | 2.16 (1.23–3.80)    | 0.01    | 2.01 (1.27–3.19)                  | 0.003   |
| <b>Eplet MM load</b>         |                     |         |                     |         |                     |         |                                   |         |
| Total eplet MM load          | 1.01 (1.01–1.02)    | 0.001   | 1.00 (0.99–1.02)    | 0.67    | 1.01 (1.00–1.02)    | 0.03    | 1.01 (1.00–1.02)                  | 0.002   |
| Antibody-verified eplets     | 1.03 (1.01–1.04)    | <0.001  | 1.03 (0.99–1.07)    | 0.22    | 1.02 (1.00–1.04)    | 0.02    | 1.03 (1.01–1.04)                  | <0.001  |
| A molecule                   | 1.02 (0.98–1.06)    | 0.48    | 1.04 (0.94–1.16)    | 0.40    | 1.01 (0.96–1.06)    | 0.86    | 1.00 (0.97–1.04)                  | 0.87    |
| B molecule                   | 1.05 (0.99–1.12)    | 0.14    | 1.01 (0.86–1.18)    | 0.92    | 1.00 (0.92–1.08)    | 0.94    | 1.05 (0.98–1.11)                  | 0.16    |
| DR molecule                  | 1.03 (1.00–1.07)    | 0.09    | 0.94 (0.85–1.03)    | 0.19    | 1.02 (0.98–1.07)    | 0.38    | 1.04 (1.00–1.07)                  | 0.04    |
| DQ molecule                  | 1.06 (1.03–1.09)    | <0.001  | 1.12 (1.04–1.20)    | 0.002   | 1.05 (1.01–1.08)    | 0.006   | 1.05 (1.02–1.08)                  | <0.001  |

ABMR=antibody-mediated rejection. DSA=donor-specific antibodies. HLA=human leukocyte antigen. HR=hazard ratio. MM=mismatch. TCMR=T cell-mediated rejection.

**Table S8: Univariable analysis of death-censored graft survival for the confounders included in the multivariable models (n=926)**

| <b>Parameters</b>                     | <b>Univariable HR (95% CI)</b> | <b>P value</b> |
|---------------------------------------|--------------------------------|----------------|
| Donor age                             | 1.02 (1.01–1.03)               | 0.006          |
| Recipient age                         | 1.01 (1.00–1.03)               | 0.03           |
| Donor sex (0=female, 1=male)          | 0.71 (0.52–0.97)               | 0.03           |
| Recipient sex (0=female, 1=male)      | 0.68 (0.50–0.94)               | 0.02           |
| Recipient race                        | 2.54 (1.04–6.22)               | 0.04           |
| Recipient BMI                         | 1.00 (0.96–1.03)               | 0.82           |
| DCD donor                             | 1.38 (0.80–2.38)               | 0.25           |
| Living donor                          | 0.43 (0.17–1.09)               | 0.08           |
| Repeat transplantation                | 1.68 (1.14–2.48)               | 0.009          |
| Cold ischemia time                    | 1.02 (0.99–1.05)               | 0.14           |
| Pre-transplant non-DSA HLA antibodies | 1.13 (0.71–1.81)               | 0.60           |
| Pre-transplant HLA-DSA antibodies     | 2.15 (1.41–3.28)               | <0.001         |

**Table S9: Harrell’s C-statistics of HLA mismatch calculations for death-censored graft survival (n=926).**

| HLA mismatch models            | Death-censored graft survival                    |                                                                 |
|--------------------------------|--------------------------------------------------|-----------------------------------------------------------------|
|                                | Univariable C-statistic<br>(95% CI) <sup>†</sup> | Multivariable <sup>‡</sup> C-statistic<br>(95% CI) <sup>†</sup> |
| HLA-A/B/DR antigens            | 0.58 (0.52–0.63)                                 | 0.68 (0.64–0.73)                                                |
| HLA-A/B/DR/DQ antigens         | 0.58 (0.53–0.63)                                 | 0.68 (0.64–0.73)                                                |
| Total antibody-verified eplets | 0.56 (0.51–0.62)                                 | 0.66 (0.63–0.72)                                                |
| DQ antibody-verified eplets    | 0.55 (0.51–0.61)                                 | 0.66 (0.63–0.72)                                                |

<sup>†</sup>95% CIs are calculated based on 1000 bootstrapped samples. <sup>‡</sup>Multivariable models were corrected for donor and recipient sex, donor and recipient age, recipient race, recipient body mass index, donor type, cold ischaemia time, repeat transplantation, and pretransplant HLA antibodies (absence; non-DSA HLA antibodies; DSA).

**Table S10: Univariable and multivariable HRs for composite of graft survival and 50% eGFR decline from 3 months onwards according to HLA antigen mismatches and eplet mismatch load (n=886).** Analyses were landmarked at three months after transplantation. 28 patients were excluded due to graft failure within the first three months, 12 due to a missing eGFR measurement at three months.

Statistically significant associations were highlighted in yellow.

| HLA mismatches               | Patients at risk | Events | Univariable HR (95% CI) | p value | Multivariable* HR (95% CI) | p value |
|------------------------------|------------------|--------|-------------------------|---------|----------------------------|---------|
| <b>Antigen (split level)</b> |                  |        |                         |         |                            |         |
| HLA-ABDR (0-6)               | 886              | 181    | 1.13 (0.99–1.29)        | 0.06    | 1.15 (1.00–1.31)           | 0.05    |
| HLA-ABDRDQ (0-8)             | 886              | 181    | 1.11 (1.00–1.23)        | 0.04    | 1.13 (1.01–1.26)           | 0.03    |
| A antigen                    |                  |        |                         |         |                            |         |
| 0 mismatch                   | 230              | 51     | 1                       | ..      | 1                          | ..      |
| 1 mismatch                   | 451              | 84     | 0.91 (0.62–1.34)        | 0.64    | 0.95 (0.64–1.40)           | 0.78    |
| 2 mismatches                 | 205              | 46     | 1.19 (0.77–1.85)        | 0.43    | 1.31 (0.84–2.05)           | 0.23    |
| B antigen                    |                  |        |                         |         |                            |         |
| 0 mismatch                   | 171              | 31     | 1                       | ..      | 1                          | ..      |
| 1 mismatch                   | 527              | 104    | 1.23 (0.79–1.91)        | 0.37    | 1.17 (0.75–1.82)           | 0.50    |
| 2 mismatches                 | 188              | 46     | 1.49 (0.89–2.49)        | 0.13    | 1.34 (0.79–2.27)           | 0.28    |
| DR antigen                   |                  |        |                         |         |                            |         |
| 0 mismatch                   | 307              | 57     |                         |         |                            |         |
| 1 mismatch                   | 539              | 110    | 1.22 (0.86–1.73)        | 0.26    | 1.31 (0.92–1.87)           | 0.13    |
| 2 mismatches                 | 40               | 14     | 1.75 (0.83–3.71)        | 0.14    | 1.62 (0.73–3.60)           | 0.24    |
| DQ antigen                   |                  |        |                         |         |                            |         |
| 0 mismatch                   | 345              | 61     | 1                       | ..      | 1                          | ..      |
| 1 mismatch                   | 469              | 103    | 1.33 (0.94–1.87)        | 0.11    | 1.38 (0.98–1.96)           | 0.07    |
| 2 mismatches                 | 72               | 17     | 1.23 (0.66–2.31)        | 0.51    | 1.29 (0.68–2.45)           | 0.44    |
| <b>Eplets</b>                |                  |        |                         |         |                            |         |
| Total eplets                 | 886              | 181    | 1.01(1.00–1.02)         | 0.14    | 1.01 (1.00–1.02)           | 0.10    |
| Antibody-verified eplets     | 886              | 181    | 1.02 (1.00–1.04)        | 0.03    | 1.02 (1.01–1.04)           | 0.01    |
| A molecule                   | 886              | 181    | 1.02 (0.97–1.07)        | 0.45    | 1.03 (0.98–1.09)           | 0.22    |
| B molecule                   | 886              | 181    | 1.08 (1.00–1.16)        | 0.05    | 1.06 (0.99–1.15)           | 0.11    |
| C molecule                   | 886              | 181    | 0.95 (0.87–1.04)        | 0.26    | 0.93 (0.85–1.02)           | 0.11    |
| DR molecule                  | 886              | 181    | 1.03 (0.99–1.08)        | 0.15    | 1.04 (0.99–1.09)           | 0.09    |
| DQ molecule                  | 886              | 181    | 1.04 (1.01–1.07)        | 0.02    | 1.05 (1.01–1.08)           | 0.01    |
| DP molecule                  | 886              | 181    | 0.99 (0.90–1.09)        | 0.84    | 1.00 (0.90–1.11)           | 0.94    |

eGFR=estimated glomerular filtration rate. HLA=human leukocyte antigen. HR=hazard ratio.

\*Multivariable models were corrected for donor and recipient sex, donor and recipient age, recipient race, recipient body mass index, donor type, cold ischaemia time, repeat transplantation, and pretransplant HLA antibodies (absence; non-DSA HLA antibodies; DSA).

**Table S11: STROBE Statement—Checklist of items included in this cohort study.**

| Section/Topic             | Item # | Recommendation                                                                                                                                                                                    | Reported on page #           |
|---------------------------|--------|---------------------------------------------------------------------------------------------------------------------------------------------------------------------------------------------------|------------------------------|
| Title and abstract        | 1      | (a) Indicate the study's design with a commonly used term in the title or the abstract                                                                                                            | 1                            |
|                           |        | (b) Provide in the abstract an informative and balanced summary of what was done and what was found                                                                                               | 3                            |
| <b>Introduction</b>       |        |                                                                                                                                                                                                   |                              |
| Background/rationale      | 2      | Explain the scientific background and rationale for the investigation being reported                                                                                                              | 4                            |
| Objectives                | 3      | State specific objectives, including any prespecified hypotheses                                                                                                                                  | 5                            |
| <b>Methods</b>            |        |                                                                                                                                                                                                   |                              |
| Study design              | 4      | Present key elements of study design early in the paper                                                                                                                                           | 6                            |
| Setting                   | 5      | Describe the setting, locations, and relevant dates, including periods of recruitment, exposure, follow-up, and data collection                                                                   | 6-9                          |
| Participants              | 6      | (a) Give the eligibility criteria, and the sources and methods of selection of participants. Describe methods of follow-up                                                                        | 6                            |
|                           |        | (b) For matched studies, give matching criteria and number of exposed and unexposed                                                                                                               | n/a                          |
| Variables                 | 7      | Clearly define all outcomes, exposures, predictors, potential confounders, and effect modifiers. Give diagnostic criteria, if applicable                                                          | 6-9                          |
| Data sources/ measurement | 8*     | For each variable of interest, give sources of data and details of methods of assessment (measurement). Describe comparability of assessment methods if there is more than one group              | 6-9                          |
| Bias                      | 9      | Describe any efforts to address potential sources of bias                                                                                                                                         | 6-9, 18-19                   |
| Study size                | 10     | Explain how the study size was arrived at                                                                                                                                                         | 6-9 and Supplement p 1       |
| Quantitative variables    | 11     | Explain how quantitative variables were handled in the analyses. If applicable, describe which groupings were chosen and why                                                                      | 6-9                          |
| Statistical methods       | 12     | (a) Describe all statistical methods, including those used to control for confounding                                                                                                             | 8-9                          |
|                           |        | (b) Describe any methods used to examine subgroups and interactions                                                                                                                               | n/a                          |
|                           |        | (c) Explain how missing data were addressed                                                                                                                                                       | 18-19                        |
|                           |        | (d) If applicable, explain how loss to follow-up was addressed                                                                                                                                    | 6, 18-19                     |
|                           |        | (e) Describe any sensitivity analyses                                                                                                                                                             | n/a                          |
| <b>Results</b>            |        |                                                                                                                                                                                                   |                              |
| Participants              | 13*    | (a) Report numbers of individuals at each stage of study—eg numbers potentially eligible, examined for eligibility, confirmed eligible, included in the study, completing follow-up, and analysed | 6, 10, 13 and Supplement p 1 |
|                           |        | (b) Give reasons for non-participation at each stage                                                                                                                                              | 10, 13 and Supplement p 1    |
|                           |        | (c) Consider use of a flow diagram                                                                                                                                                                | Supplement p 1               |
| Descriptive data          | 14*    | (a) Give characteristics of study participants (eg demographic, clinical, social) and information on exposures and potential confounders                                                          | 26 - 27                      |
|                           |        | (b) Indicate number of participants with missing data for each variable of interest                                                                                                               | n/a; see item #12 (c)        |
|                           |        | (c) Summarise follow-up time (eg, average and total amount)                                                                                                                                       | 10                           |
| Outcome data              | 15*    | Report numbers of outcome events or summary measures over time                                                                                                                                    | 10                           |

|                          |    |                                                                                                                                                                                                              |                                   |
|--------------------------|----|--------------------------------------------------------------------------------------------------------------------------------------------------------------------------------------------------------------|-----------------------------------|
| Main results             | 16 | (a) Give unadjusted estimates and, if applicable, confounder-adjusted estimates and their precision (eg, 95% confidence interval). Make clear which confounders were adjusted for and why they were included | 28 - 32                           |
|                          |    | (b) Report category boundaries when continuous variables were categorized                                                                                                                                    | n/a; see item #11                 |
|                          |    | (c) If relevant, consider translating estimates of relative risk into absolute risk for a meaningful time period                                                                                             | n/a                               |
| Other analyses           | 17 | Report other analyses done—eg analyses of subgroups and interactions, and sensitivity analyses                                                                                                               | n/a; see item #12 (b) and #12 (e) |
| <b>Discussion</b>        |    |                                                                                                                                                                                                              |                                   |
| Key results              | 18 | Summarise key results with reference to study objectives                                                                                                                                                     | 16, 19                            |
| <b>Limitations</b>       |    |                                                                                                                                                                                                              |                                   |
| Interpretation           | 20 | Give a cautious overall interpretation of results considering objectives, limitations, multiplicity of analyses, results from similar studies, and other relevant evidence                                   | 16-19                             |
| Generalisability         | 21 | Discuss the generalisability (external validity) of the study results                                                                                                                                        | 16, 18                            |
| <b>Other information</b> |    |                                                                                                                                                                                                              |                                   |
| Funding                  | 22 | Give the source of funding and the role of the funders for the present study and, if applicable, for the original study on which the present article is based                                                | 20                                |
